# Supplementary material for: Response of Osteosarcoma Cell Metabolism to Platinum and Palladium Chelates as Potential New Drugs
Source: MDPI journal article supplement (doi:10.3390/molecules26164805), 2021-08-08
Supplement: s1 [file s1]

## Article SUPPLEMENTARY INFORMATION

# Response of Osteosarcoma Cell Metabolism to Platinum and Palladium Chelates as Potential New Drugs

Ana S. Martins <sup>1,2</sup>, Ana L. M. Batista de Carvalho <sup>2</sup>, Maria P. M. Marques <sup>2,3,\*</sup> and Ana M. Gil <sup>1,\*</sup>

<sup>1</sup> CICECO – Aveiro Institute of Materials (CICECO/UA), Department of Chemistry, University of Aveiro, Campus Universitário de Santiago, 3810-193 Aveiro, Portugal

<sup>2</sup> Unidade de I&D Química-Física Molecular, Department of Chemistry, University of Coimbra, Rua Larga, 300-535 Coimbra, Portugal

<sup>3</sup> Department of Life Sciences, Faculty of Science and Technology, University of Coimbra, Calçada Martim de Freitas, 3000-456 Coimbra, Portugal

\* Correspondence: agil@ua.pt (A.M.G.); pmc@ci.uc.pt (M.P.M.M.)

**Table S1.** List of metabolites and corresponding spin systems identified in the 500 MHz <sup>1</sup>H NMR spectra of aqueous extracts of OS MG-63 cells. Multiplicity: *s*, singlet; *d*, doublet; *t*, triplet; *q*, quartet; *m*, multiplet; *dd*, double doublet; *br*, broad. 2-HBA: 2-hydroxybutyrate; Ado: adenosine; ADP: adenosine diphosphate; ATP: adenosine triphosphate; DMA: dimethylamine; GPC: glycerophosphocholine; GSH: glutathione (reduced); GTP: guanosine triphosphate; Ino: inosine; NAD<sup>+</sup>: nicotinamide adenine dinucleotide; PC: phosphocholine; UDP-GalNAc: uridine 5'-diphospho-*N*-acetylgalactosamine; UDP-Glc: uridine 5'-diphosphoglucose; UDP-GlcA: uridine 5'-diphosphoglucuronic acid; UDP-GlcNAc: uridine 5'-diphospho-*N*-acetylglucosamine. Spectral assignment was based on comparison with existing literature [51–52] and data available on spectral databases, such as the Bruker BIORECODE database and the human metabolome database (HMDB) [53].

| Metabolite assignment              | δ <sub>H</sub> ppm (multiplicity, assignment)                                                                                           |
|------------------------------------|-----------------------------------------------------------------------------------------------------------------------------------------|
| <i>Amino acids</i>                 |                                                                                                                                         |
| Alanine                            | 1.48 (d, β-CH <sub>3</sub> ); 3.78 (q, α-CH)                                                                                            |
| Aspartate                          | 2.68 (dd, β-CH); 2.82 (dd, β'-CH); 3.90 (dd, α-CH)                                                                                      |
| Glutamate                          | 2.05 (m, β-CH <sub>2</sub> ); 2.13 (m, β'-CH <sub>2</sub> ); 2.36 (m, γ-CH <sub>2</sub> ); 3.75 (dd, α-CH)                              |
| Glutamine                          | 2.14 (m, β-CH <sub>2</sub> ); 2.47 (m, γ-CH <sub>2</sub> ); 3.78 (t, α-CH)                                                              |
| Glycine                            | 3.56 (s, α-CH <sub>2</sub> )                                                                                                            |
| Histidine                          | 7.08 (s, C4H, ring)                                                                                                                     |
| Isoleucine                         | 0.94 (t, δ-CH <sub>3</sub> ); 1.02 (d, γ-CH <sub>3</sub> )                                                                              |
| Leucine                            | 0.96 (t, δ-CH <sub>3</sub> ); 1.71 (m, β-CH <sub>2</sub> /γ-CH)                                                                         |
| Lysine                             | 1.47 (m, γ-CH <sub>2</sub> ); 1.73 (m, δ-CH <sub>2</sub> ); 1.92 (m, β-CH <sub>2</sub> ); 3.02 (m, ε-CH <sub>2</sub> ); 3.76 (t, α-CH); |
| Methionine                         | 2.65 (t, γ-CH <sub>2</sub> )                                                                                                            |
| Phenylalanine                      | 3.14 (m, β-CH); 3.99 (m, α-CH); 7.33 (m C2H)/C6H, ring); 7.39 (m, C4H, ring); 7.43 (m, C3H/C5H, ring)                                   |
| Serine                             | 3.85 (dd, α-CH); 3.97 (m, β-CH <sub>2</sub> ); 3.99 (dd, β'-CH <sub>2</sub> )                                                           |
| Taurine                            | 3.26 (t, S-CH <sub>2</sub> ); 3.42 (t, N-CH <sub>2</sub> )                                                                              |
| Tyrosine                           | 3.07 (m, β'-CH <sub>2</sub> ); 3.21 (m, β-CH <sub>2</sub> ); 3.96 (m, α-CH); 6.91 (d, C3H/C5H, ring); 7.20 (d, C2H/C6H, ring)           |
| Valine                             | 0.99 (d, γ-CH <sub>3</sub> ); 1.05 (d, γ'-CH <sub>3</sub> ); 2.28 (m, β-CH)                                                             |
| <i>Choline compounds</i>           |                                                                                                                                         |
| Choline                            | 3.21 (s, N(CH <sub>3</sub> ) <sub>3</sub> ); 3.53 (m, β-CH <sub>2</sub> (NH)); 4.07 (m, α-CH <sub>2</sub> (OH))                         |
| GPC                                | 3.24 (s, N(CH <sub>3</sub> ) <sub>3</sub> ); 3.94 (m, α-CH <sub>2</sub> ); 4.33 (m, α-CH <sub>2</sub> (PO <sub>3</sub> ))               |
| PC                                 | 3.22 (s, N(CH <sub>3</sub> ) <sub>3</sub> ); 3.60 (m, N-CH <sub>2</sub> ); 4.17 (m, PO <sub>3</sub> -CH <sub>2</sub> )                  |
| <i>Nucleotides and derivatives</i> |                                                                                                                                         |
| Ado/Ino                            | 4.28 (q, C4'H, ribose); 4.44 (dd, C3'H, ribose); 6.10 (d, C1'H, ribose); 8.24 (s, C2H, ring); 8.35 (s, C8H, ring)                       |
| ADP                                | 4.22 (m, C5'H, ribose); 4.38 (m, C4'H); 6.15 (d, C1'H, ribose); 8.28 (s, C2H, ring); 8.52 (s, C8H, ring)                                |
| ATP                                | 4.22 (m, C5'H, ribose); 4.39 (m, C4'H); 6.14 (d, C1'H, ribose); 8.27 (s, C2H, ring); 8.54 (s, C8H, ring)                                |
| GTP                                | 5.94 (d, C1'H, ribose); 8.14 (s, C8H, ring)                                                                                             |
| NAD <sup>+</sup>                   | 8.18 (s, A2); 8.43 (s, A8); 8.83 (d, N4); 9.15 (d, N6); 9.34 (s, N2)                                                                    |
| UDP-GalNAc                         | 5.55 (m, C1H, Gal)                                                                                                                      |
| UDP-Glc                            | 5.61 (dd); 5.99 (d); 7.95 (d, C6H, ring)                                                                                                |
| UDP-GlcA                           | 5.97 (d); 7.96 (d, C6H, ring)                                                                                                           |
| UDP-GlcNAc                         | 5.52 (m, C1H, Glc)                                                                                                                      |



|                    |          |                             |                        |                             |                        |                             |                        |
|--------------------|----------|-----------------------------|------------------------|-----------------------------|------------------------|-----------------------------|------------------------|
| Acetate            | 1.92 (s) | 6.06 ± 2.68 <sup>a</sup>    | 1.0 × 10 <sup>-7</sup> | 10.48 ± 4.34 <sup>a,b</sup> | 4.6 × 10 <sup>-7</sup> | 6.00 ± 2.66 <sup>a</sup>    | 1.1 × 10 <sup>-7</sup> |
| Formate            | 8.46 (s) | 2.27 ± 1.45                 | 7.9 × 10 <sup>-3</sup> | 7.91 ± 3.36 <sup>a</sup>    | 2.0 × 10 <sup>-5</sup> | 4.89 ± 2.26 <sup>a</sup>    | 7.5 × 10 <sup>-6</sup> |
| Fumarate           | 6.52 (s) | -4.10 ± 1.99 <sup>a</sup>   | 3.3 × 10 <sup>-5</sup> | -3.81 ± 1.90 <sup>a</sup>   | 6.4 × 10 <sup>-5</sup> | -3.04 ± 1.66 <sup>a</sup>   | 3.7 × 10 <sup>-4</sup> |
| Lactate            | 1.33 (d) | —                           | —                      | -5.51 ± 2.48 <sup>a,b</sup> | 3.0 × 10 <sup>-6</sup> | -7.49 ± 3.20 <sup>a,b</sup> | 4.5 × 10 <sup>-8</sup> |
| Succinate          | 2.40 (s) | -2.67 ± 1.56 <sup>a</sup>   | 9.4 × 10 <sup>-4</sup> | -2.40 ± 1.48 <sup>a,b</sup> | 1.9 × 10 <sup>-3</sup> | —                           | —                      |
| Other compounds    |          |                             |                        |                             |                        |                             |                        |
| 2-HBA              | 0.89 (t) | —                           | —                      | 2.51 ± 1.51 <sup>a</sup>    | 1.5 × 10 <sup>-3</sup> | 2.06 ± 1.40                 | 5.2 × 10 <sup>-3</sup> |
| β-Glucose          | 5.24 (d) | 2.67 ± 1.56 <sup>a</sup>    | 9.4 × 10 <sup>-4</sup> | —                           | —                      | —                           | —                      |
| Acetone            | 2.23 (s) | —                           | —                      | —                           | —                      | 2.73 ± 1.57 <sup>a</sup>    | 7.8 × 10 <sup>-4</sup> |
| Cadaverine         | 3.02 (t) | —                           | —                      | —                           | —                      | -2.83 ± 1.60 <sup>a</sup>   | 6.2 × 10 <sup>-4</sup> |
| Creatine           | 3.04 (s) | -2.49 ± 1.51 <sup>a,b</sup> | 1.5 × 10 <sup>-3</sup> | —                           | —                      | —                           | —                      |
| DMA                | 2.73 (s) | —                           | —                      | 2.40 ± 1.48 <sup>a</sup>    | 1.9 × 10 <sup>-3</sup> | 2.56 ± 1.53 <sup>a</sup>    | 1.0 × 10 <sup>-3</sup> |
| Ethanol            | 1.18 (t) | —                           | —                      | 1.96 ± 1.38                 | 6.9 × 10 <sup>-3</sup> | 2.84 ± 1.60 <sup>a</sup>    | 6.1 × 10 <sup>-4</sup> |
| GSH                | 3.79 (m) | 5.19 ± 2.37 <sup>a</sup>    | 4.2 × 10 <sup>-6</sup> | 5.97 ± 2.64 <sup>a,c</sup>  | 7.3 × 10 <sup>-5</sup> | 6.54 ± 2.85 <sup>a</sup>    | 5.0 × 10 <sup>-7</sup> |
| <i>m</i> -Inositol | 4.06 (t) | —                           | —                      | -2.71 ± 1.57 <sup>a,b</sup> | 8.4 × 10 <sup>-4</sup> | -1.64 ± 1.31                | 2.5 × 10 <sup>-2</sup> |

<sup>a</sup> Metabolite variation remaining significant after Bonferroni correction [57]; <sup>b</sup> metabolite variations reported previously for cDDP-treated cancer cells [21,27,28,30,36,37]; <sup>c</sup> metabolite variations noted in different direction compared to previous reports for cDDP-treated cancer cells [21,27,28,30,36,37].

**Table S3.** Metabolite variations in MG-63 cells exposed to 100 µM OXA at 24, 48, and 72 h, compared to controls. Only statistically significant differences are shown (*p*-value < 0.05), also compliant with effect size modulus |ES| > 0.50, ES error < 75%. 3-Letter codes are used for amino acids; UXP: either of UDP/UTP/UDP-Gal/GlcNAc species; other abbreviations as defined in Table S1.

| Metabolite                  | $\delta_{\text{H}}$ ppm<br>(multiplicity) | OXA                             |                      |                                 |                      |                               |                      |
|-----------------------------|-------------------------------------------|---------------------------------|----------------------|---------------------------------|----------------------|-------------------------------|----------------------|
|                             |                                           | 24 h                            |                      | 48 h                            |                      | 72h                           |                      |
|                             |                                           | ES $\pm$ Error                  | <i>p</i> -value      | ES $\pm$ Error                  | <i>p</i> -value      | ES $\pm$ Error                | <i>p</i> -value      |
| Amino acids                 |                                           |                                 |                      |                                 |                      |                               |                      |
| Ala                         | 1.48 (d)                                  | —                               | —                    | -6.52 $\pm$ 2.84 <sup>a</sup>   | 5.2 $\times 10^{-7}$ | -4.21 $\pm$ 2.03 <sup>a</sup> | 2.6 $\times 10^{-5}$ |
| Asp                         | 2.68 (dd)                                 | -3.14 $\pm$ 1.69 <sup>a</sup>   | 2.9 $\times 10^{-4}$ | -2.55 $\pm$ 1.52 <sup>a</sup>   | 1.2 $\times 10^{-3}$ | -2.94 $\pm$ 1.63 <sup>a</sup> | 4.5 $\times 10^{-4}$ |
| Gln                         | 2.47 (m)                                  | -2.08 $\pm$ 1.40 <sup>d</sup>   | 4.8 $\times 10^{-3}$ | -3.02 $\pm$ 1.66 <sup>a,d</sup> | 3.9 $\times 10^{-4}$ | -2.53 $\pm$ 1.52 <sup>a</sup> | 1.4 $\times 10^{-3}$ |
| Glu                         | 2.36 (m)                                  | -1.94 $\pm$ 1.37 <sup>d</sup>   | 7.1 $\times 10^{-3}$ | -1.97 $\pm$ 1.38 <sup>d</sup>   | 6.8 $\times 10^{-3}$ | —                             | —                    |
| Gly                         | 3.56 (s)                                  | —                               | —                    | —                               | —                    | -1.81 $\pm$ 1.34              | 9.8 $\times 10^{-3}$ |
| His                         | 7.08 (s)                                  | —                               | —                    | —                               | —                    | -2.77 $\pm$ 1.58 <sup>a</sup> | 7.3 $\times 10^{-4}$ |
| Ile                         | 0.94 (t)                                  | —                               | —                    | -2.08 $\pm$ 1.41                | 4.8 $\times 10^{-3}$ | —                             | —                    |
| Leu                         | 0.96 (t)                                  | —                               | —                    | -6.19 $\pm$ 2.72 <sup>a</sup>   | 8.3 $\times 10^{-7}$ | -2.17 $\pm$ 1.43 <sup>a</sup> | 3.8 $\times 10^{-3}$ |
| Met                         | 2.65 (t)                                  | -2.83 $\pm$ 1.60 <sup>a</sup>   | 6.4 $\times 10^{-4}$ | -2.82 $\pm$ 1.60 <sup>a</sup>   | 6.4 $\times 10^{-4}$ | -3.74 $\pm$ 1.87 <sup>a</sup> | 6.9 $\times 10^{-5}$ |
| Phe                         | 7.33 (m)                                  | —                               | —                    | -2.14 $\pm$ 1.42 <sup>a,b</sup> | 4.1 $\times 10^{-3}$ | -2.26 $\pm$ 1.45 <sup>a</sup> | 2.9 $\times 10^{-3}$ |
| Ser                         | 3.97 (dd)                                 | 4.01 $\pm$ 1.96 <sup>a</sup>    | 4.0 $\times 10^{-5}$ | 12.08 $\pm$ 4.96 <sup>a</sup>   | 1.4 $\times 10^{-9}$ | 8.47 $\pm$ 3.57 <sup>a</sup>  | 2.8 $\times 10^{-8}$ |
| Tau                         | 3.42 (t)                                  | -1.88 $\pm$ 1.36                | 8.7 $\times 10^{-3}$ | -2.79 $\pm$ 1.59 <sup>a</sup>   | 7.0 $\times 10^{-4}$ | —                             | —                    |
| Tyr                         | 6.91 (d)                                  | —                               | —                    | -3.46 $\pm$ 1.79 <sup>a</sup>   | 1.3 $\times 10^{-4}$ | -2.33 $\pm$ 1.47 <sup>a</sup> | 2.1 $\times 10^{-3}$ |
| Val                         | 1.05 (d)                                  | —                               | —                    | -3.10 $\pm$ 1.68 <sup>a</sup>   | 3.1 $\times 10^{-3}$ | —                             | —                    |
| Choline compounds           |                                           |                                 |                      |                                 |                      |                               |                      |
| Choline                     | 3.21 (s)                                  | 4.84 $\pm$ 2.24 <sup>a,c</sup>  | 7.7 $\times 10^{-6}$ | 4.03 $\pm$ 1.97 <sup>a</sup>    | 3.8 $\times 10^{-5}$ | 2.09 $\pm$ 1.41 <sup>a</sup>  | 4.7 $\times 10^{-3}$ |
| GPC                         | 3.24 (s)                                  | 3.24 $\pm$ 1.72 <sup>a</sup>    | 1.9 $\times 10^{-4}$ | 2.23 $\pm$ 1.44 <sup>a</sup>    | 2.4 $\times 10^{-3}$ | 2.92 $\pm$ 1.62 <sup>a</sup>  | 4.6 $\times 10^{-4}$ |
| Nucleotides and derivatives |                                           |                                 |                      |                                 |                      |                               |                      |
| Ado/Ino                     | 4.28 (q)                                  | 1.86 $\pm$ 1.36                 | 9.0 $\times 10^{-3}$ | 3.96 $\pm$ 1.94 <sup>a</sup>    | 4.5 $\times 10^{-5}$ | —                             | —                    |
| ATP                         | 4.39 (m)                                  | 2.45 $\pm$ 1.49 <sup>a</sup>    | 1.7 $\times 10^{-3}$ | 3.84 $\pm$ 1.91 <sup>a</sup>    | 5.8 $\times 10^{-5}$ | 2.82 $\pm$ 1.60 <sup>a</sup>  | 6.4 $\times 10^{-4}$ |
| UDP-GalNAc                  | 5.55 (m)                                  | 3.77 $\pm$ 1.88 <sup>a</sup>    | 6.6 $\times 10^{-5}$ | —                               | —                    | —                             | —                    |
| UDP-GlcA                    | 7.96 (d)                                  | 5.12 $\pm$ 2.34 <sup>a</sup>    | 3.9 $\times 10^{-6}$ | 4.17 $\pm$ 2.02 <sup>a</sup>    | 3.2 $\times 10^{-5}$ | 2.85 $\pm$ 1.61 <sup>a</sup>  | 6.2 $\times 10^{-4}$ |
| UDP-GlcNAc                  | 5.52 (m)                                  | 7.66 $\pm$ 3.27 <sup>a</sup>    | 1.1 $\times 10^{-7}$ | 2.26 $\pm$ 1.45 <sup>a</sup>    | 2.9 $\times 10^{-3}$ | —                             | —                    |
| UXP                         | 5.99 (m)                                  | 3.39 $\pm$ 1.77 <sup>a</sup>    | 1.2 $\times 10^{-4}$ | 3.63 $\pm$ 1.84 <sup>a</sup>    | 7.9 $\times 10^{-5}$ | 2.82 $\pm$ 1.60 <sup>a</sup>  | 6.4 $\times 10^{-4}$ |
| Organic acids               |                                           |                                 |                      |                                 |                      |                               |                      |
| Acetate                     | 1.92 (s)                                  | 6.12 $\pm$ 2.70 <sup>a</sup>    | 9.0 $\times 10^{-7}$ | 2.27 $\pm$ 1.45 <sup>a</sup>    | 2.8 $\times 10^{-3}$ | —                             | —                    |
| Formate                     | 6.52 (s)                                  | 3.16 $\pm$ 1.70 <sup>a</sup>    | 2.7 $\times 10^{-4}$ | 4.66 $\pm$ 2.18 <sup>a,c</sup>  | 1.5 $\times 10^{-5}$ | 2.42 $\pm$ 1.49 <sup>a</sup>  | 1.9 $\times 10^{-3}$ |
| Fumarate                    | 1.33 (d)                                  | -2.97 $\pm$ 1.64 <sup>a,d</sup> | 4.3 $\times 10^{-4}$ | -3.59 $\pm$ 1.83 <sup>a</sup>   | 9.4 $\times 10^{-5}$ | -1.95 $\pm$ 1.37              | 7.0 $\times 10^{-3}$ |
| Lactate                     | 2.40 (s)                                  | —                               | —                    | -5.41 $\pm$ 2.44 <sup>a</sup>   | 2.9 $\times 10^{-6}$ | -9.64 $\pm$ 4.02 <sup>a</sup> | 1.2 $\times 10^{-8}$ |

|                 |          |                    |                      |                       |                      |                    |                      |
|-----------------|----------|--------------------|----------------------|-----------------------|----------------------|--------------------|----------------------|
| Succinate       | 1.92 (s) | $-2.87 \pm 1.61^a$ | $5.8 \times 10^{-4}$ | $-1.96 \pm 1.38$      | $7.0 \times 10^{-3}$ | –                  | –                    |
| Other compounds |          |                    |                      |                       |                      |                    |                      |
| Cadaverine      | 3.02 (t) | –                  | –                    | –                     | –                    | $-2.82 \pm 1.60^a$ | $6.4 \times 10^{-4}$ |
| Creatine        | 3.04 (s) | $-2.07 \pm 1.40$   | $5.0 \times 10^{-3}$ | –                     | –                    | –                  | –                    |
| DMA             | 2.73 (s) | –                  | –                    | $2.32 \pm 1.46^a$     | $2.2 \times 10^{-3}$ | –                  | –                    |
| GSH             | 3.79 (m) | $2.64 \pm 1.55^a$  | $3.0 \times 10^{-3}$ | $8.37 \pm 3.54^{a,c}$ | $4.8 \times 10^{-8}$ | $6.63 \pm 2.88^a$  | $4.4 \times 10^{-7}$ |

<sup>a</sup> Metabolite variation remaining significant after Bonferroni correction [57]; <sup>b</sup> newly identified variations compared to cDDP-treated MG-63 cells; <sup>c</sup> metabolite variations reported previously for OXA-treated cancer cells [38,58]; <sup>d</sup> metabolite variations noted in different direction compared to previous reports for OXA-treated cancer cells [38,58].

**Table S4.** Metabolite variations in MG-63 cells exposed to 240  $\mu$ M Pt2Spm at 24, 48, and 72 h, compared to controls. Only statistically significant differences are shown ( $p$ -value < 0.05), also compliant with effect size modulus  $|ES| > 0.50$ , ES error < 75%. 3-Letter codes are used for amino acids; UXP: either of UDP/UTP/UDP-Gal/GlcNAc species; other abbreviations as defined in Table S1.

| Metabolite                  | $\delta_{\text{H}}$ ppm<br>(multiplicity) | Pt2Spm                           |                               |                                   |                               |                               |                               |
|-----------------------------|-------------------------------------------|----------------------------------|-------------------------------|-----------------------------------|-------------------------------|-------------------------------|-------------------------------|
|                             |                                           | 24 h                             |                               | 48 h                              |                               | 72h                           |                               |
|                             |                                           | ES $\pm$ Error                   | <i>p</i> -value               | ES $\pm$ Error                    | <i>p</i> -value               | ES $\pm$ Error                | <i>p</i> -value               |
| Amino acids                 |                                           |                                  |                               |                                   |                               |                               |                               |
| Ala                         | 1.48 (d)                                  | 2.48 $\pm$ 1.50 <sup>a</sup>     | 1.6 $\times$ 10 <sup>-3</sup> | –                                 | –                             | –                             | –                             |
| Asp                         | 2.68 (dd)                                 | -2.07 $\pm$ 1.40                 | 5.0 $\times$ 10 <sup>-3</sup> | –                                 | –                             | -1.80 $\pm$ 1.34              | 9.9 $\times$ 10 <sup>-3</sup> |
| Gln                         | 2.47 (m)                                  | -3.34 $\pm$ 1.75 <sup>a</sup>    | 1.7 $\times$ 10 <sup>-4</sup> | -5.06 $\pm$ 2.32 <sup>a</sup>     | 4.4 $\times$ 10 <sup>-6</sup> | –                             | –                             |
| Glu                         | 2.36 (m)                                  | -2.72 $\pm$ 1.57 <sup>a</sup>    | 8.0 $\times$ 10 <sup>-4</sup> | -1.80 $\pm$ 1.34 <sup>a</sup>     | 9.9 $\times$ 10 <sup>-3</sup> | –                             | –                             |
| Gly                         | 3.56 (s)                                  | 2.62 $\pm$ 1.54 <sup>a,b,c</sup> | 1.1 $\times$ 10 <sup>-3</sup> | –                                 | –                             | -1.88 $\pm$ 1.36              | 8.7 $\times$ 10 <sup>-3</sup> |
| His                         | 7.08 (s)                                  | 1.86 $\pm$ 1.35 <sup>b,c</sup>   | 9.3 $\times$ 10 <sup>-3</sup> | –                                 | –                             | –                             | –                             |
| Ile                         | 0.94 (t)                                  | 4.91 $\pm$ 2.27 <sup>a,b,c</sup> | 6.8 $\times$ 10 <sup>-6</sup> | 3.47 $\pm$ 1.79 <sup>a</sup>      | 6.6 $\times$ 10 <sup>-4</sup> | –                             | –                             |
| Leu                         | 0.96 (t)                                  | 4.92 $\pm$ 2.27 <sup>a,b,c</sup> | 6.7 $\times$ 10 <sup>-6</sup> | 2.30 $\pm$ 1.46                   | 9.3 $\times$ 10 <sup>-3</sup> | –                             | –                             |
| Lys                         | 1.92 (m)                                  | 2.59 $\pm$ 1.53 <sup>a</sup>     | 2.0 $\times$ 10 <sup>-3</sup> | 2.31 $\pm$ 1.44                   | 9.1 $\times$ 10 <sup>-3</sup> | –                             | –                             |
| Phe                         | 7.33 (m)                                  | 3.71 $\pm$ 1.87 <sup>a,b,c</sup> | 7.5 $\times$ 10 <sup>-5</sup> | –                                 | –                             | –                             | –                             |
| Ser                         | 3.97 (dd)                                 | 3.34 $\pm$ 1.75 <sup>a</sup>     | 1.7 $\times$ 10 <sup>-4</sup> | 2.45 $\pm$ 1.50                   | 7.0 $\times$ 10 <sup>-3</sup> | 1.82 $\pm$ 1.34               | 9.5 $\times$ 10 <sup>-3</sup> |
| Tau                         | 3.42 (t)                                  | 4.74 $\pm$ 2.21 <sup>a</sup>     | 9.4 $\times$ 10 <sup>-6</sup> | 3.35 $\pm$ 1.75 <sup>a</sup>      | 1.8 $\times$ 10 <sup>-4</sup> | –                             | –                             |
| Tyr                         | 6.91 (d)                                  | 4.69 $\pm$ 2.19 <sup>a,b,c</sup> | 1.0 $\times$ 10 <sup>-5</sup> | –                                 | –                             | –                             | –                             |
| Val                         | 1.05 (d)                                  | 5.15 $\pm$ 2.35 <sup>a,b,c</sup> | 4.5 $\times$ 10 <sup>-6</sup> | –                                 | –                             | –                             | –                             |
| Choline compounds           |                                           |                                  |                               |                                   |                               |                               |                               |
| Choline                     | 3.21 (s)                                  | 6.87 $\pm$ 2.97 <sup>a</sup>     | 2.8 $\times$ 10 <sup>-7</sup> | 2.68 $\pm$ 1.56 <sup>a</sup>      | 2.7 $\times$ 10 <sup>-3</sup> | 2.85 $\pm$ 1.61 <sup>a</sup>  | 5.8 $\times$ 10 <sup>-4</sup> |
| GPC                         | 3.24 (s)                                  | 10.06 $\pm$ 4.18 <sup>a</sup>    | 8.2 $\times$ 10 <sup>-9</sup> | 4.01 $\pm$ 1.96 <sup>a</sup>      | 8.9 $\times$ 10 <sup>-4</sup> | 3.06 $\pm$ 1.67 <sup>a</sup>  | 3.4 $\times$ 10 <sup>-4</sup> |
| PC                          | 3.22 (s)                                  | –                                | –                             | –                                 | –                             | 2.23 $\pm$ 1.44 <sup>a</sup>  | 2.3 $\times$ 10 <sup>-3</sup> |
| Nucleotides and derivatives |                                           |                                  |                               |                                   |                               |                               |                               |
| Ado/Ino                     | 4.28 (q)                                  | –                                | –                             | -1.56 $\pm$ 1.29                  | 2.2 $\times$ 10 <sup>-2</sup> | –                             | –                             |
| ATP                         | 4.39 (m)                                  | –                                | –                             | -2.76 $\pm$ 1.58 <sup>a</sup>     | 7.4 $\times$ 10 <sup>-4</sup> | –                             | –                             |
| GTP                         | 5.94 (d)                                  | -2.91 $\pm$ 1.62 <sup>a,b</sup>  | 5.0 $\times$ 10 <sup>-4</sup> | -2.62 $\pm$ 1.54 <sup>a</sup>     | 1.1 $\times$ 10 <sup>-3</sup> | –                             | –                             |
| NAD <sup>+</sup>            | 8.43 (s)                                  | –                                | –                             | -3.71 $\pm$ 1.86 <sup>a</sup>     | 7.5 $\times$ 10 <sup>-5</sup> | -3.65 $\pm$ 1.85 <sup>a</sup> | 8.7 $\times$ 10 <sup>-5</sup> |
| UDP-GlcA                    | 7.96 (d)                                  | -2.20 $\pm$ 1.43 <sup>a</sup>    | 2.8 $\times$ 10 <sup>-3</sup> | –                                 | –                             | –                             | –                             |
| Uridine                     | 7.87 (d)                                  | –                                | –                             | 4.28 $\pm$ 2.05 <sup>a,c</sup>    | 2.3 $\times$ 10 <sup>-5</sup> | –                             | –                             |
| UXP                         | 5.99 (m)                                  | -2.22 $\pm$ 1.44                 | 2.5 $\times$ 10 <sup>-2</sup> | -4.76 $\pm$ 2.21 <sup>a</sup>     | 8.9 $\times$ 10 <sup>-6</sup> | –                             | –                             |
| Organic acids               |                                           |                                  |                               |                                   |                               |                               |                               |
| Acetate                     | 1.92 (s)                                  | 2.67 $\pm$ 1.56 <sup>a</sup>     | 9.9 $\times$ 10 <sup>-4</sup> | 1.98 $\pm$ 1.38                   | 6.4 $\times$ 10 <sup>-3</sup> | –                             | –                             |
| Formate                     | 6.52 (s)                                  | 2.06 $\pm$ 1.40                  | 5.2 $\times$ 10 <sup>-3</sup> | 1.95 $\pm$ 1.38                   | 7.1 $\times$ 10 <sup>-3</sup> | 2.01 $\pm$ 1.39               | 6.0 $\times$ 10 <sup>-3</sup> |
| Fumarate                    | 1.33 (d)                                  | –                                | –                             | -2.10 $\pm$ 1.41 <sup>a</sup>     | 4.5 $\times$ 10 <sup>-3</sup> | –                             | –                             |
| Succinate                   | 2.40 (s)                                  | -2.87 $\pm$ 1.61 <sup>a</sup>    | 5.8 $\times$ 10 <sup>-4</sup> | –                                 | –                             | –                             | –                             |
| Other compounds             |                                           |                                  |                               |                                   |                               |                               |                               |
| 2-HBA                       | 0.89 (t)                                  | 2.79 $\pm$ 1.59 <sup>a,b,c</sup> | 7.0 $\times$ 10 <sup>-4</sup> | 4.83 $\pm$ 2.24 <sup>a</sup>      | 9.0 $\times$ 10 <sup>-5</sup> | 1.85 $\pm$ 1.35               | 6.5 $\times$ 10 <sup>-3</sup> |
| β-Glucose                   | 5.24 (d)                                  | 7.03 $\pm$ 3.03 <sup>a</sup>     | 2.6 $\times$ 10 <sup>-7</sup> | –                                 | –                             | –                             | –                             |
| Cadaverine                  | 3.02 (t)                                  | 2.46 $\pm$ 1.50 <sup>a,b,c</sup> | 1.7 $\times$ 10 <sup>-3</sup> | 1.84 $\pm$ 1.35 <sup>a,c</sup>    | 9.6 $\times$ 10 <sup>-3</sup> | 1.90 $\pm$ 1.36               | 8.2 $\times$ 10 <sup>-3</sup> |
| Creatine                    | 3.04 (s)                                  | -5.66 $\pm$ 2.53 <sup>a</sup>    | 1.9 $\times$ 10 <sup>-6</sup> | -4.06 $\pm$ 1.98 <sup>a,b,c</sup> | 3.6 $\times$ 10 <sup>-5</sup> | -2.51 $\pm$ 1.51 <sup>a</sup> | 1.4 $\times$ 10 <sup>-3</sup> |

|                    |          |                              |                        |                               |                        |                             |                        |
|--------------------|----------|------------------------------|------------------------|-------------------------------|------------------------|-----------------------------|------------------------|
| DMA                | 2.73 (s) | 4.11 ± 2.00 <sup>a,b,c</sup> | 3.9 × 10 <sup>-5</sup> | 2.13 ± 1.42 <sup>a</sup>      | 4.1 × 10 <sup>-3</sup> | 2.09 ± 1.41 <sup>a,c</sup>  | 4.7 × 10 <sup>-3</sup> |
| Ethanol            | 1.18 (t) | —                            | —                      | 2.30 ± 1.46 <sup>a</sup>      | 9.3 × 10 <sup>-3</sup> | 2.65 ± 1.55 <sup>a,e</sup>  | 1.0 × 10 <sup>-3</sup> |
| GSH                | 3.79 (m) | 3.66 ± 1.85 <sup>a</sup>     | 8.4 × 10 <sup>-5</sup> | 4.64 ± 2.17 <sup>a</sup>      | 1.7 × 10 <sup>-5</sup> | —                           | —                      |
| Hypoxanthine       | 8.20 (s) | —                            | —                      | -2.94 ± 1.63 <sup>a,b,c</sup> | 4.7 × 10 <sup>-4</sup> | -3.02 ± 1.66 <sup>a,b</sup> | 3.8 × 10 <sup>-4</sup> |
| <i>m</i> -Inositol | 4.06 (t) | -1.82 ± 1.35 <sup>b,c</sup>  | 9.5 × 10 <sup>-3</sup> | -4.23 ± 2.04 <sup>a</sup>     | 2.5 × 10 <sup>-5</sup> | -2.34 ± 1.47 <sup>a</sup>   | 2.0 × 10 <sup>-3</sup> |

<sup>a</sup> Metabolite variation remaining significant after Bonferroni correction [57]; newly identified variations compared to <sup>b</sup> CDDP-treated MG-63 and <sup>c</sup> OXA-treated MG-63 cells.

**Table S5.** Metabolite variations in MG-63 cells exposed to 24 µM Pd2Spm at 24, 48, and 72 h, compared to controls. Only statistically significant differences are shown ( $p$ -value < 0.05), also compliant with effect size modulus  $|ES| > 0.50$ , ES error < 75%. 3-Letter codes are used for amino acids; other abbreviations as defined in Table S1.

| Metabolite                  | $\delta_{\text{H}}$ ppm<br>(multiplicity) | Pd2Spm                          |                      |                                   |                       |                                  |                      |
|-----------------------------|-------------------------------------------|---------------------------------|----------------------|-----------------------------------|-----------------------|----------------------------------|----------------------|
|                             |                                           | 24 h                            |                      | 48 h                              |                       | 72h                              |                      |
|                             |                                           | ES $\pm$ Error                  | <i>p</i> -value      | ES $\pm$ Error                    | <i>p</i> -value       | ES $\pm$ Error                   | <i>p</i> -value      |
| Amino acids                 |                                           |                                 |                      |                                   |                       |                                  |                      |
| Ala                         | 1.48 (d)                                  | —                               | —                    | -2.80 $\pm$ 1.59 <sup>a,d</sup>   | 6.8 $\times 10^{-4}$  | —                                | —                    |
| Gln                         | 2.47 (m)                                  | -2.36 $\pm$ 1.47 <sup>a</sup>   | 2.2 $\times 10^{-3}$ | —                                 | —                     | —                                | —                    |
| Gly                         | 3.56 (s)                                  | -1.89 $\pm$ 1.36                | 8.3 $\times 10^{-3}$ | -2.16 $\pm$ 1.42 <sup>a,b,d</sup> | 3.8 $\times 10^{-3}$  | -5.24 $\pm$ 2.38 <sup>a</sup>    | 3.6 $\times 10^{-6}$ |
| His                         | 7.08 (s)                                  | 3.10 $\pm$ 1.68 <sup>a</sup>    | 3.3 $\times 10^{-4}$ | —                                 | —                     | —                                | —                    |
| Ile                         | 0.94 (t)                                  | 2.85 $\pm$ 1.61 <sup>a,b</sup>  | 5.8 $\times 10^{-4}$ | —                                 | —                     | —                                | —                    |
| Leu                         | 0.96 (t)                                  | 2.36 $\pm$ 1.47 <sup>a</sup>    | 2.2 $\times 10^{-3}$ | —                                 | —                     | —                                | —                    |
| Phe                         | 7.33 (m)                                  | 2.36 $\pm$ 1.47 <sup>a</sup>    | 2.2 $\times 10^{-3}$ | —                                 | —                     | —                                | —                    |
| Ser                         | 3.97 (dd)                                 | 2.88 $\pm$ 1.61 <sup>a</sup>    | 5.5 $\times 10^{-4}$ | —                                 | —                     | 2.78 $\pm$ 1.59 <sup>a</sup>     | 7.1 $\times 10^{-4}$ |
| Tau                         | 3.42 (t)                                  | —                               | —                    | 2.35 $\pm$ 1.47 <sup>b</sup>      | 8.2 $\times 10^{-3}$  | —                                | —                    |
| Val                         | 1.05 (d)                                  | 2.61 $\pm$ 1.54 <sup>a,b</sup>  | 1.2 $\times 10^{-3}$ | —                                 | —                     | —                                | —                    |
| Choline compounds           |                                           |                                 |                      |                                   |                       |                                  |                      |
| Choline                     | 3.21 (s)                                  | 4.84 $\pm$ 2.24 <sup>a,c</sup>  | 7.7 $\times 10^{-6}$ | 4.03 $\pm$ 1.97 <sup>a</sup>      | 3.8 $\times 10^{-5}$  | 2.09 $\pm$ 1.41 <sup>a</sup>     | 4.7 $\times 10^{-3}$ |
| GPC                         | 3.24 (s)                                  | 1.86 $\pm$ 1.35 <sup>c</sup>    | 9.3 $\times 10^{-3}$ | 4.04 $\pm$ 1.97 <sup>a,c</sup>    | 3.8 $\times 10^{-5}$  | 3.30 $\pm$ 1.74 <sup>a</sup>     | 1.2 $\times 10^{-3}$ |
| PC                          | 3.22 (s)                                  | 1.88 $\pm$ 1.36                 | 8.5 $\times 10^{-3}$ | 19.17 $\pm$ 7.75 <sup>a,b</sup>   | 1.5 $\times 10^{-11}$ | 6.80 $\pm$ 2.95 <sup>a</sup>     | 3.1 $\times 10^{-7}$ |
| Nucleotides and derivatives |                                           |                                 |                      |                                   |                       |                                  |                      |
| Ado/Ino                     | 4.28 (q)                                  | —                               | —                    | 2.77 $\pm$ 1.58 <sup>a,b</sup>    | 7.2 $\times 10^{-4}$  | —                                | —                    |
| GTP                         | 5.94 (d)                                  | —                               | —                    | -2.94 $\pm$ 1.63 <sup>a</sup>     | 4.7 $\times 10^{-4}$  | —                                | —                    |
| UDP-GlcA                    | 7.96 (d)                                  | 2.78 $\pm$ 1.58 <sup>a,d</sup>  | 7.1 $\times 10^{-4}$ | 3.02 $\pm$ 1.66 <sup>a,d</sup>    | 3.8 $\times 10^{-4}$  | —                                | —                    |
| Uridine                     | 7.87 (d)                                  | —                               | —                    | 3.48 $\pm$ 1.80 <sup>a</sup>      | 1.3 $\times 10^{-4}$  | 2.57 $\pm$ 1.53 <sup>a,b,d</sup> | 1.2 $\times 10^{-3}$ |
| Organic acids               |                                           |                                 |                      |                                   |                       |                                  |                      |
| Acetate                     | 1.92 (s)                                  | 3.40 $\pm$ 1.77 <sup>a</sup>    | 1.0 $\times 10^{-4}$ | 6.76 $\pm$ 2.93 <sup>a</sup>      | 3.7 $\times 10^{-7}$  | 3.12 $\pm$ 1.68 <sup>a</sup>     | 3.2 $\times 10^{-4}$ |
| Formate                     | 6.52 (s)                                  | 2.59 $\pm$ 1.53 <sup>a</sup>    | 2.0 $\times 10^{-3}$ | 5.19 $\pm$ 2.36 <sup>a</sup>      | 4.2 $\times 10^{-6}$  | 2.61 $\pm$ 1.54 <sup>a</sup>     | 1.2 $\times 10^{-3}$ |
| Fumarate                    | 1.33 (d)                                  | -3.49 $\pm$ 1.80 <sup>a,d</sup> | 9.9 $\times 10^{-5}$ | —                                 | —                     | —                                | —                    |
| Lactate                     | 2.40 (s)                                  | —                               | —                    | -2.68 $\pm$ 1.56 <sup>a,d</sup>   | 9.2 $\times 10^{-4}$  | -2.07 $\pm$ 1.40 <sup>d</sup>    | 5.0 $\times 10^{-3}$ |
| Succinate                   | 1.92 (s)                                  | -2.39 $\pm$ 1.48                | 6.5 $\times 10^{-3}$ | —                                 | —                     | —                                | —                    |
| Other compounds             |                                           |                                 |                      |                                   |                       |                                  |                      |
| 2-HBA                       | 0.89 (t)                                  | 2.94 $\pm$ 1.63 <sup>a</sup>    | 4.7 $\times 10^{-4}$ | 3.26 $\pm$ 1.73 <sup>a</sup>      | 2.1 $\times 10^{-4}$  | —                                | —                    |
| Cadaverine                  | 3.02 (t)                                  | —                               | —                    | 5.16 $\pm$ 2.35 <sup>a</sup>      | 4.4 $\times 10^{-6}$  | 2.28 $\pm$ 1.45 <sup>a</sup>     | 2.7 $\times 10^{-3}$ |
| Creatine                    | 3.04 (s)                                  | -4.80 $\pm$ 2.23 <sup>a</sup>   | 8.4 $\times 10^{-6}$ | 2.29 $\pm$ 1.46 <sup>a</sup>      | 2.6 $\times 10^{-3}$  | —                                | —                    |
| DMA                         | 2.73 (s)                                  | —                               | —                    | 1.92 $\pm$ 1.37                   | 7.7 $\times 10^{-3}$  | —                                | —                    |
| GSH                         | 3.79 (m)                                  | 1.90 $\pm$ 1.36 <sup>b</sup>    | 8.2 $\times 10^{-3}$ | 6.74 $\pm$ 2.93 <sup>a,b</sup>    | 3.8 $\times 10^{-7}$  | 2.05 $\pm$ 1.40 <sup>d</sup>     | 5.6 $\times 10^{-3}$ |
| <i>m</i> -Inositol          | 4.06 (t)                                  | —                               | —                    | -3.87 $\pm$ 1.92 <sup>a,b</sup>   | 6.0 $\times 10^{-5}$  | -2.02 $\pm$ 1.39                 | 5.8 $\times 10^{-3}$ |

<sup>a</sup> Metabolite variation remaining significant after Bonferroni correction [57]; <sup>b</sup> metabolite variations reported previously for Pd2Spm-treated MG-63 cells [21]; <sup>c</sup> metabolite variations noted in different direction compared to previous report for Pd2Spm-treated MG-63 cells [21]; <sup>d</sup> newly identified variations compared to Pd2Spm-treated MG-63 cells.

Figure S1

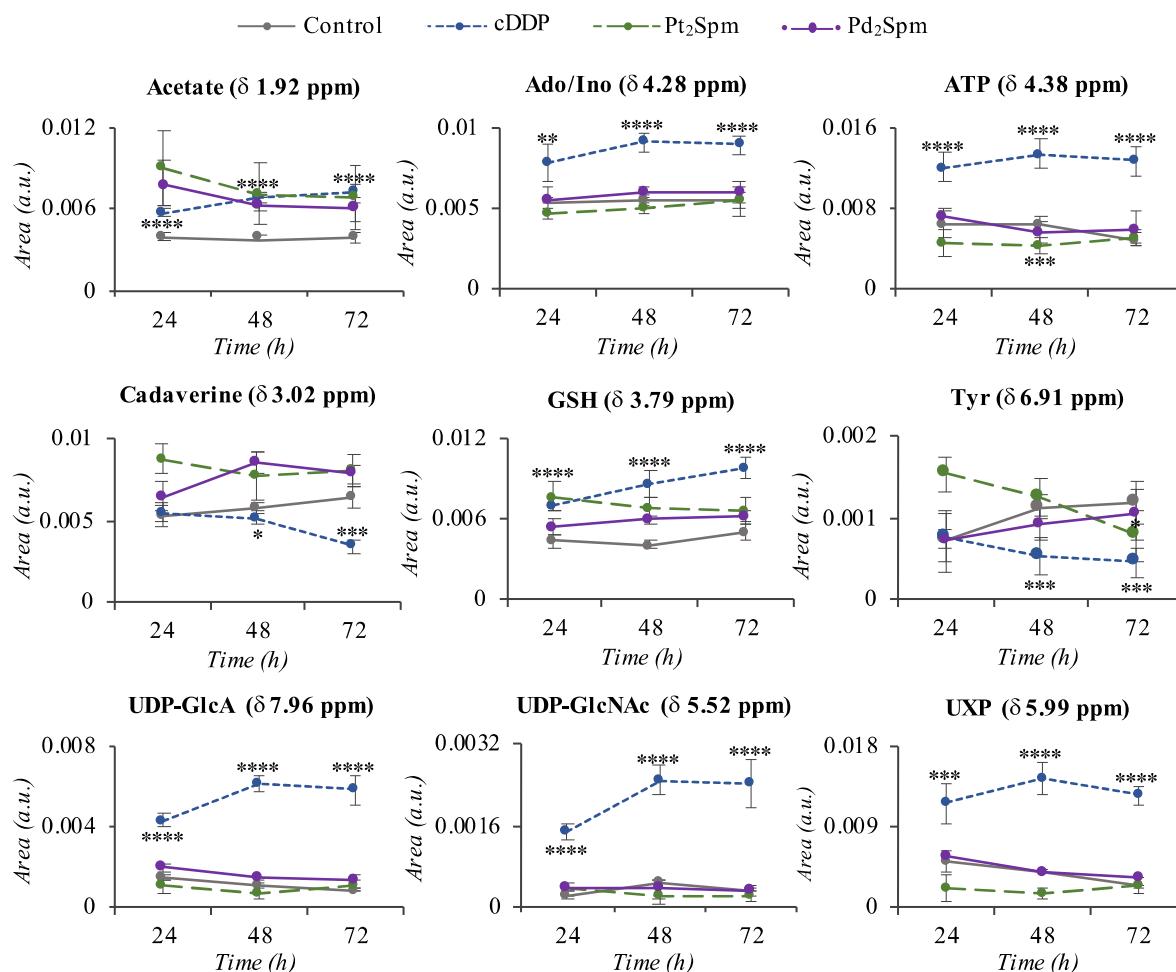

**Figure S1.** Time course changes for selected metabolites in MG-63 cells exposed to Pt<sub>2</sub>Spm, compared to cDDP and controls. Graphs represent peak areas normalized by total spectral area, as a function of time. Control conditions (grey solid line), exposure to 30  $\mu$ M cDDP (blue dotted line), 240  $\mu$ M Pt<sub>2</sub>Spm (green long dashed line) or 24  $\mu$ M Pd<sub>2</sub>Spm (purple twodashed line). \*  $p$ -value < 0.05; \*\*  $p$ -value < 0.01; \*\*\*  $p$ -value < 0.001; \*\*\*\*  $p$ -value < 0.0001; only indicated for cDDP for the sake of graph clarity; the reader is directed to Tables S2-S5 or Figure 4 to consult statistical significance for each metabolite variation. Abbreviations: 3-letter code used for amino acids, ATP: adenosine triphosphate; GSH: glutathione (reduced); UDP-GlcA: uridine 5'-diphosphoglucuronic acid; UDP-GlcNAc: uridine 5'-diphospho-N-acetylglucosamine; UXP: either of UDP/UTP/UDP-Gal/GlcNAc species.
